# Supplementary material for: Ethnic/Racial Variation in Prostate Cancer Net Survival: A Systematic Review
Source: Research Square preprint supplement (doi:10.21203/rs.3.rs-8734466/v1), 2026-02-12
Supplement: Supplementary file 1 [file 955f5a2c94a9b7a7071c0913.docx]

Supplementary Table 1: NS estimates and standard errors [ US studies]

| **Author** | **NS_white** | **SE_white** | **NS**  **Black** | **SE**  **Black** | **age** | **Estimator** | **Stage** |
| --- | --- | --- | --- | --- | --- | --- | --- |
| Yang_2020 | 98.8 | 0.13 | 96.2 | 0.41 | - | Relative survival ratio | - |
| Siegel_2024 | 98 | 0.18 | 97 | 0.18 | - | Relative survival ratio | - |
| Cetin_2010 | 28 | 1.3 | 25.5 | 2.6 | - | Relative survival ratio | - |
| Sung_2023 | 87 | 0.05 | 81 | 0.76 | - | Relative survival ratio | - |
| deLacerdaa_2019 | 99.1 | 0.08 | 95.5 | 0.2 | - | Relative survival ratio | - |
| Pulte_2012 | 99.7 | 0.2 | 98.3 | 0.7 | - | Relative survival ratio | - |
| Steele_2017 | 96.9 | 0.1 | 92.7 | 0.31 | - | Pohar Perme | - |
| Devasia_2023 | 31 | 0.51 | 30 | 1.02 | - | Relative survival ratio | - |
| Chen_2024 | 96.6 | 0.2 | 94.9 | 0.5 | - | Relative survival ratio | - |
| Siegel_2020 | 97.9 | 0 | 95.6 | 0.05 | - | Relative survival ratio | - |
| Jemal_2017 | 98 | 0.05 | 95.2 | 0.15 | - | Relative survival ratio | - |
| Merill_2011 | 93.4 | - | 88.9 | - | - | Relative survival ratio | - |
| Desantis_16 | 99 | - | 97 | - | - | Relative survival ratio | - |
| Hu_2013 | 50.5 | - | 41.3 | - | - | Relative survival ratio | - |
| Islami_2022 | 98 | - | 96 | - | - | Relative survival ratio | - |
| Howdler_2010 | 101.3 | - | 101.5 | - | <65 years | Relative survival ratio | - |
| Howdler_2010 | 104.5 | - | 101.5 | - | >65 years | Relative survival ratio | - |
| Stroup_2014 | 100 | - | 97 | - | <65 years | Relative survival ratio | - |
| Stroup_2014 | 100 | - | 98 | - | 65-74 years | Relative survival ratio | - |
| Stroup_2014 | 98 | - | 98 | - | 75-84 years | Relative survival ratio | - |
| Stroup_2014 | 74 | - | 84 | - | 85 + years | Relative survival ratio | - |
| Stroup_2014 | 100 | - | 99 | - | <65 years | Relative survival ratio | - |
| Stroup_2014 | 100 | - | 100 | - | 65-74 years | Relative survival ratio | - |
| Stroup_2014 | 100 | - | 93 | - | 75-84 years | Relative survival ratio | - |
| Stroup_2014 | 80 | - | 75 | - | 85 + years | Relative survival ratio | - |
| Krokschoen_2018 | 100 | 0 | 100 | 0 | 65-74 | Relative survival ratio | Regional |
| Krokschoen_2018 | 97.7 | 2.1 | 85.6 | 7.1 | 75-84 | Relative survival ratio | Regional |
| Krokschoen_2018 | 65.9 | 2.4 | 55.5 | 13.3 | 85+ year | Relative survival ratio | Regional |
| Krokschoen_2018 | 34.1 | 1.15 | 29.4 | 1.14 | 65-74 | Relative survival ratio | Distant |
| Krokschoen_2018 | 25.9 | 1.2 | 24.2 | 2.8 | 75-84 | Relative survival ratio | Distant |
| Krokschoen_2018 | 17.7 | 1.83 | 16.2 | 3.98 | 85+ year | Relative survival ratio | Distant |
| Krokschoen_2018 | 100 | 0 | 100 | 0 | 65-74 | Relative survival ratio | Localised |
| Krokschoen_2018 | 100 | 0 | 100 | 0 | 75-84 | Relative survival ratio | Localised |
| Krokschoen_2018 | 100 | 0 | 97.9 | 14.9 | 85+ year | Relative survival ratio | Localised |
|  | | | | | | | |
| **Author** | **NS white** | **SE_white** | **NS_Asian** | **SE_Asian** | **-** | **Estimator** | **Stage** |
| Chen_2024 | 96.6 | 0.2 | 93.1 | 0.6 | - | Relative survival ratio | - |
| de Lacerdaa_2019 | 99.1 | 0.08 | 96 | 0.23 | - | Relative survival ratio | - |
| Siegel_2020 | 97.9 | 0 | 95.1 | 0.08 | - | Relative survival ratio | - |
| Sung_2023 | 87 | 0.05 | 81 | 1.28 | - | Relative survival ratio | - |
| Islami | 98 | - | 95 | - | - | Relative survival ratio | - |
|  |  |  |  |  |  |  |  |
| **Author** | **NS_white** | **SE** | **NS_indians** | **SE** |  | **Estimator** | **Stage** |
| Chen_2024 | 97 | 0.2 | 89.2 | 3 | - | Relative survival ratio | - |
| deLacerdaa_2019 | 99.1 | 0.08 | 95.5 | 1.35 | - | Relative survival ratio | - |
| Nash_2023 | 98 | 0.001 | 94.8 | 0.102 | - | Relative survival ratio | - |
| Siegel_2020 | 97.9 | 0 | 95.7 | 0.26 | - | Relative survival ratio | - |
| Islami_2022 | 98 | - | 89 |  | - | Relative survival ratio | - |
| Howlader_2010_a | 101.3 | - | 93.4 | - | <65 | Relative survival ratio | - |
| Howlader_2010_b | 104.5 | - | 87.9 | - | >=65 | Relative survival ratio | - |
|  |  |  |  |  |  |  |  |
| **Author** | **NS White** | **SE** | **NS Hispanics** | **SE** | **age** | **Estimator** | **Stage** |
| Sung_2023 | 87 | 0.05 | 81 | 0.82 | - | Relative survival ratio | - |
| de Lacerdaa_2019 | 99.1 | 0.08 | 94.8 | 0.2 | - | Relative survival ratio | - |
| Pulte_2012 | 99.7 | 0.2 | 98.7 | 1.2 | - | Relative survival ratio | - |
| Siegel_2020 | 97.9 | 0 | 95.3 | 0.05 | - | Relative survival ratio | - |
| Islami_2022 | 98 | - | 94 | - | - | Relative survival ratio | - |

Supplementary Table 2: Canadian studies

| **Author** | **NS White** | **SE_White** | **NS_other** | **SE_other** | **Estimator** | **Stage** |
| --- | --- | --- | --- | --- | --- | --- |
| Malagon_2025_WB | 94.6 | 0.18 | 95.1 | 0.94 | Regression-based | - |
| Malagon_2025_WEA | 94.6 | 0.18 | 97.3 | 0.69 | Regression-based | - |
| Malagon_2025_WMEA | 94.6 | 0.18 | 90.5 | 2.07 | Regression-based | - |
| Malagon_2025_WNSA | 94.6 | 0.18 | 94.8 | 0.89 | Regression-based | - |
| Malagon_2025_WSEA | 94.6 | 0.18 | 95.9 | 1.45 | Regression-based | - |
| Malagon_2025_WLATINA | 94.6 | 0.18 | 97.9 | 3.41 | Regression-based | - |
| Malagon_2025_WINDIGE | 94.6 | 0.18 | 90.4 | 0.18 | Regression-based | - |
| Malagon_2025_Wother | 94.6 | 0.18 | 100 | 0 | Regression-based | - |
|  |  |  |  |  |  |  |
| Mazereew_2018 | NS Non-aboriginal (NA) | SE_NA | NS Metis | SE_Metis | Estimator | Stage |
| 93.2 | 0.36 | 65.4 | 7.14 | Regression-based | - |
| Withrow_2017 | NS First Nationals (FN) | SE_FN | NS Aboriginal | SE_A | Regression-based | - |
| 87 | 2.81 | 93.9 | 0.28 |  | - |

Other ethnicity: W=”White”, B=”Black”, EA=”East Asian”, MEA=”Middle East Asia”, NSA=”North South Asian”, SEA=”South East Asian”, LATINA=”Latin America”, INDIGE=”Indigenous”.

Supplementary Table 3: UK Studies and an Australian study.

| **Author** | **NS White** | **SE_white** | **Non_White** | **SE_Non_white** | **Estimator** | **stage** |
| --- | --- | --- | --- | --- | --- | --- |
| Redaniel_2013 | 106 | 0.76 | 107 | 1.56 | Relative survival ratio | - |
| Redaniel_2013 | 106 | 0.76 | 107 | 0.51 | Relative survival ratio | - |
|  |  |  |  |  |  | - |
| **Author** | **NS Asians** | **SE_asian** | **Non-Asians** | **SE_non_asian** | **Estimator** | - |
| Maringe_2015 | 78.4 | 4.21 | 81.1 | 0.54 | Pohar Perme | - |
| Dasgupta_2022 | NS Aboriginal/Torres Strait Islander (AT) | SE_AT | NS Other Australia | SE_other | Estimator | - |
| 77.4 | 0.97 | 87.5 | 0.1 | Regression-based estimator | - |

NS: Net survival. The first two studies were from the UK, the last one is from the Australia.
